# Supplementary material for: Co3O4nanosheets as a high-performance catalyst for oxygen evolution proceeding via a double two-electron process
Source: Royal Society of Chemistry journal article supplement (doi:10.1039/c6cc01450j), 2016-01-01
Supplement: c6cc01450j1.pdf [file c6cc01450j1.pdf]

## Electronic Supplementary Information

# **Co<sub>3</sub>O<sub>4</sub> nanosheets as the high-performance catalyst for oxygen evolution proceeding *via* the twice two-electron process**

Shichao Du,<sup>a</sup> Zhiyu Ren,<sup>b\*</sup> Yang Qu,<sup>b</sup> Jun Wu,<sup>b</sup> Wang Xi,<sup>b</sup> Jiaqing Zhu<sup>b</sup> & Honggang Fu<sup>a, b \*</sup>

<sup>a</sup> *Institute of Theoretical Chemistry, JiLin University, 130023 ChangChun P. R. China.*

<sup>b</sup> *Key Laboratory of Functional Inorganic Material Chemistry, Ministry of Education of the People's Republic of China; School of Chemistry and Materials Science, Heilongjiang University, 150080 Harbin P. R. China.*

*Tel: +86-451-86604330;*

*Fax: +86-451-86661259;*

*E-mail address: [fuhg@vip.sina.com](mailto:fuhg@vip.sina.com); [zyren@hlju.edu.cn](mailto:zyren@hlju.edu.cn).*

## 1. Experimental Section

### 1.1 Materials

$\text{Co}(\text{NO}_3)_2 \cdot 6\text{H}_2\text{O}$  were obtained from Beijing Chemical Reagents. Ethanol and toluene were obtained from Longxi Chemical Corp. Oleylamine (OAm) (99%) was obtained from Aladdin Chemistry Co. All of the reagents and solvents were analytical grade and used as received without further purification.

### 1.2 Preparation of materials

#### *Synthesis of $\text{Co}^{2+}$ -OAm complex by phase-transfer process.*

In a typical procedure, 0.2 mmol  $\text{Co}(\text{NO}_3)_2 \cdot 6\text{H}_2\text{O}$  was dissolved in 20 mL deionized water, then 20 ml ethanol containing OAm ( $3.5\text{ mmol} \cdot \text{L}^{-1}$ ) was added. After sufficient mixing, the  $\text{Co}^{2+}$ -OAm complex was formed. Afterwards, 20 mL toluene was added and stirred for 5 mins. The mixture was then transferred to a separatory funnel and stationary for 1 h to separate water and toluene. At last, the  $\text{Co}^{2+}$ -OAm dissolved in toluene (the upper layer) was separated and used in next step.

#### *Synthesis of $\text{Co}_3\text{O}_4$ NSs, $\text{Co}_3\text{O}_4$ NPs and calcinated $\text{Co}_3\text{O}_4$ NSs.*

The prepared  $\text{Co}^{2+}$ -OAm complex in toluene was transferred into a three-necked bottle with sustained  $\text{O}_2$  bubble to keep the oxygen enrichment environment. After the solution was heated to  $50\text{ }^\circ\text{C}$  and kept, the aqueous of  $\text{NaBH}_4$  ( $0.01\text{ mol} \cdot \text{L}^{-1}$ ) was added dropwise. The molar ratio of  $\text{NaBH}_4$  and  $\text{Co}^{2+}$ -OAm was about 5:1. The reaction was held at  $50\text{ }^\circ\text{C}$  for 2 h. After reaction, the brown products precipitated into the aqueous layer were separated by using vacuum filtration. After washing with water and ethanol several times, the free-standing ultrathin  $\text{Co}_3\text{O}_4$  NSs were obtained. The  $\text{Co}_3\text{O}_4$  NPs was prepared by the similar produce, except that the reaction was held at  $0\text{ }^\circ\text{C}$  for 5 h. The calcinated  $\text{Co}_3\text{O}_4$  NSs were obtained by thermal-treatment of  $\text{Co}_3\text{O}_4$  NSs at  $300\text{ }^\circ\text{C}$  in air for 2 h.

### 1.3 Electrochemical Measurements

Electrochemical experiments were performed on an electrochemical workstation (BAS 100B, USA). A standard three-electrode cell was employed, using a saturated calomel electrode (SCE, saturated KCl-filled) and a Pt wire as the reference and the counter electrode, respectively. A rotating disk electrode (RDE-2, BAS USA) and a glassy carbon electrode (GCE) with 3 mm diameter were used as working electrodes for OER and H<sub>2</sub>O<sub>2</sub> oxidation, respectively. 5 mg of catalyst dispersed in 200  $\mu$ L mixed solution containing 20  $\mu$ L of 5 wt.% Nafion ionomer and 180  $\mu$ L of alcohol. After the catalyst ink was sonicated for at least 30 min, about 5  $\mu$ L of the catalyst ink was evenly covered onto the RDE or GCE electrode surface and allowed to dry at ambient temperature.

Before measuring, each working electrode was cycled 20-100 times by cyclic voltammetry (CV, at a scan rate of 100 mV·s<sup>-1</sup>) in electrolyte (1 M KOH), until a stable CV curve was obtained. The polarization curves were converted from linear sweep voltammetry (LSV, 100% *iR*-compensation correction) was kept the scan rate at 5 mV·s<sup>-1</sup>. Chronopotentiometry was performed under a serial constant current density of 10 mA·cm<sup>-2</sup>, controlled by a VersaSTAT 3 electrochemistry workstation. To gain insight into the reaction mechanism, the rotating ring-disk electrode (RRDE, Pine Research Instrumentation, USA) curves were measured in 0.1 M KOH solution (N<sub>2</sub>-saturated). The potentials on the Pt ring electrode were set as 1.2 V and 0.6 V vs. RHE for detecting HO<sub>2</sub><sup>-</sup> and O<sub>2</sub> produced at the disk electrode, respectively. To evaluate the activity of the catalyst towards H<sub>2</sub>O<sub>2</sub> oxidation, H<sub>2</sub>O<sub>2</sub> (30 vol%) solution was used for electrochemical measurements. OER performance tests involving RDE and RRDE were carried out with the working electrode continuously rotating at 1600 rpm to get rid of the oxygen bubbles. All the tests were carried out at room temperature (about 25 °C).

The Tafel slope was calculated from the Tafel equation as follows  $\eta = b \times \log(j/j_0)$ , where  $\eta$  is the overpotential,  $b$  is the Tafel slope,  $j$  is the current density, and  $j_0$  is the exchange current density.<sup>51</sup>

#### 1.4 Characterization

The scanning electron microscopy (SEM with an acceleration voltage of 15 kV and the energy dispersive X-Ray spectroscopy (EDX, Hitachi S-4800) was used to observe the morphologies and the elementary composition. The transmission electron microscopy (TEM, JEOL JEM-3010) with an acceleration voltage of 300 kV was employed as the morphology of the products (carbon-coated copper grids were used as sample holders for TEM analysis). Chemical compositions of the samples were checked by X-ray photoelectron spectroscopy (XPS, AXIS UL TRA DLD). X-ray diffraction (XRD) patterns were obtained by a Bruker D8 ADVANCE diffractometer by using Cu K $\alpha$  radiation ( $\lambda = 1.5406 \text{ \AA}$ ). The Raman spectra were recorded with a Raman spectrophotometer (HR800, HORIBA Jobin Yvon Company, the laser with 457.9 nm wavelength). The specific surface area of the samples was calculated by Brunauer-Emmett-Teller (BET) equation performed by Nitrogen adsorption-desorption isotherms at 77 K (Micromeritics Tristar II 3020 nitrogen adsorption apparatus).

## 2. Results and discussion

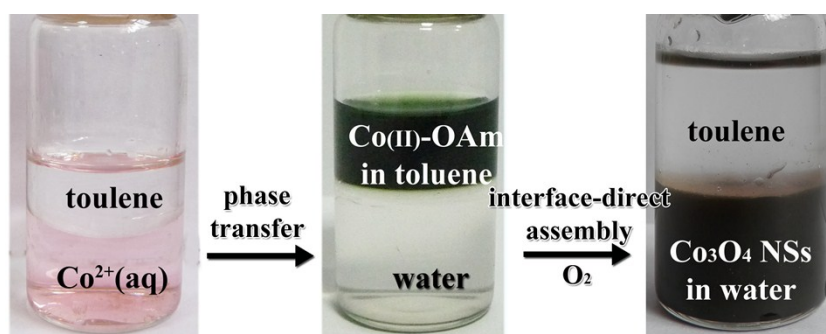

Fig. S1 The photos of the synthesis process of Co<sub>3</sub>O<sub>4</sub> NSs.

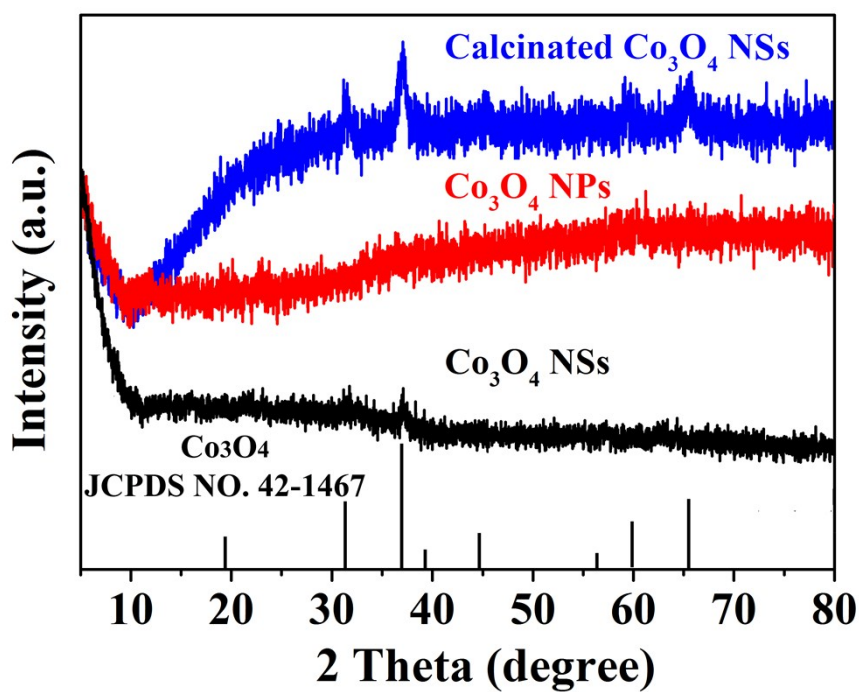

Fig. S2 XRD patterns of Co<sub>3</sub>O<sub>4</sub> NSs, Co<sub>3</sub>O<sub>4</sub> NPs and calcinated Co<sub>3</sub>O<sub>4</sub> NSs.

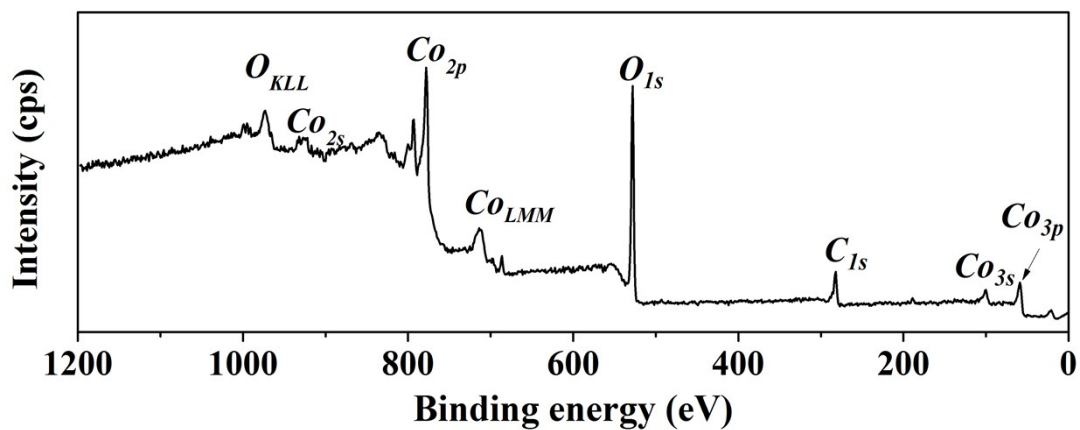

Fig. S3 The XPS spectrum of  $\text{Co}_3\text{O}_4$  NSs.

Table S1 The element analyst of  $\text{Co}_3\text{O}_4$  NSs obtained by EDX and XPS.

| Method | Element (at%) |       |      |       |
|--------|---------------|-------|------|-------|
|        | Co            | O     | N    | C     |
| XPS    | 32.22         | 47.69 | 0.23 | 19.86 |
| EDX    | 35.83         | 55.23 | 0    | 8.94  |

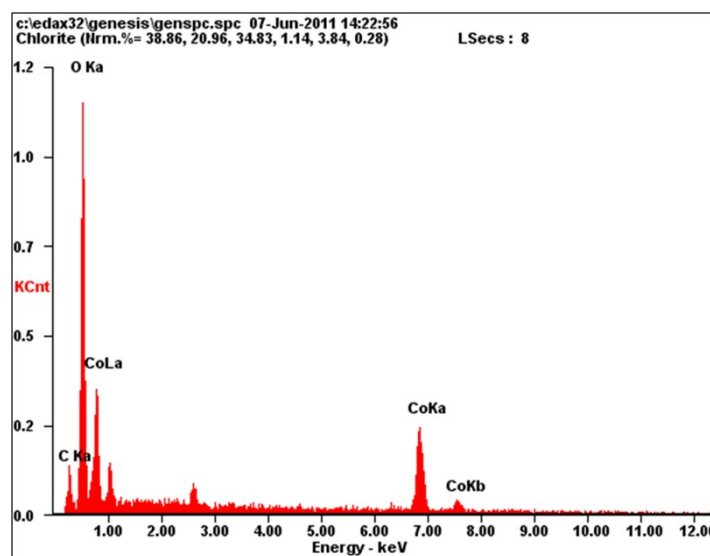

Fig. S4 EDX spectrum of  $\text{Co}_3\text{O}_4$  NSs.

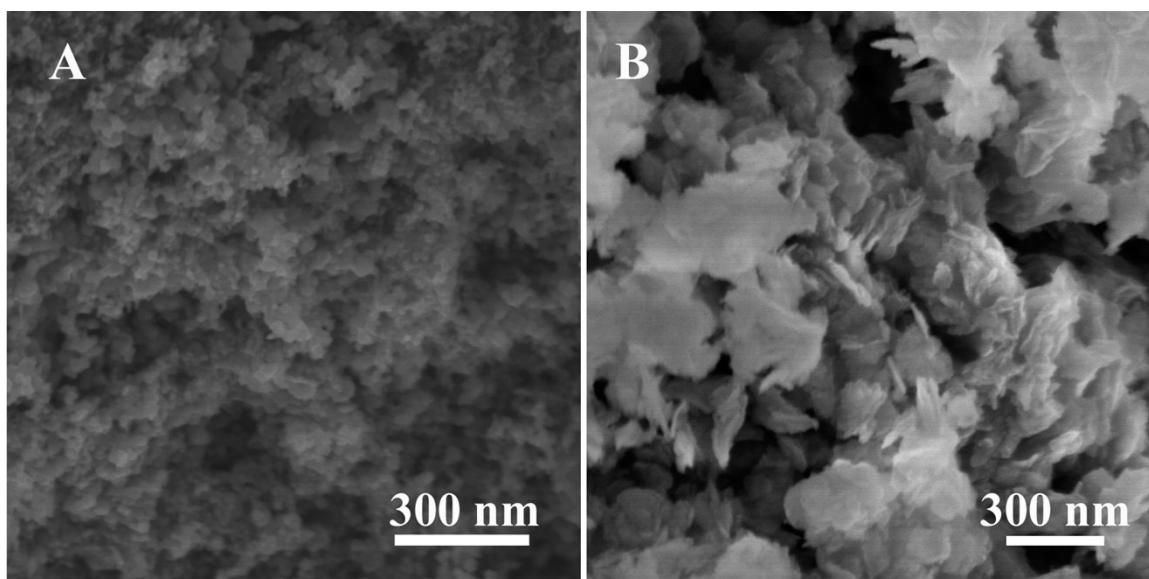

Fig. S5 The SEM images of  $\text{Co}_3\text{O}_4$  NPs (A) and calcinated  $\text{Co}_3\text{O}_4$  NSs (B).

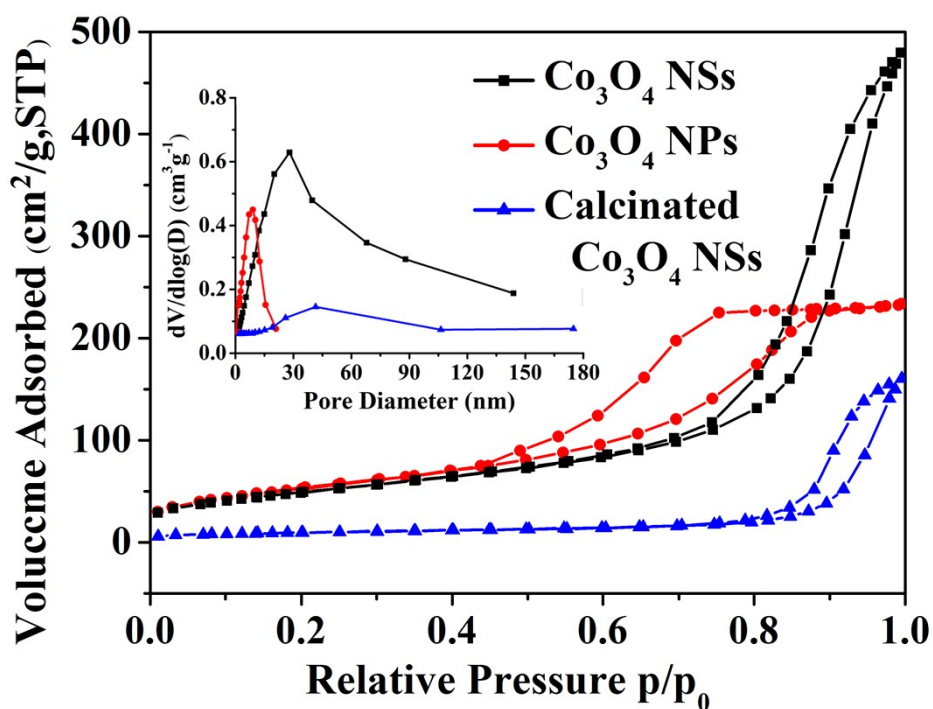

Fig. S6 Nitrogen adsorption-desorption isotherms and pore-size distribution curves (inset) of  $\text{Co}_3\text{O}_4$  NSs,  $\text{Co}_3\text{O}_4$  NPs and calcinated  $\text{Co}_3\text{O}_4$  NSs.

Table S2. Comparison of BET surface area and pore diameter of  $\text{Co}_3\text{O}_4$  NSs,  $\text{Co}_3\text{O}_4$  NPs and calcinated  $\text{Co}_3\text{O}_4$  NSs.

| Sample name                            | BET Surface area<br>( $\text{m}^2\cdot\text{g}^{-1}$ ) | Pore diameter<br>(nm) |
|----------------------------------------|--------------------------------------------------------|-----------------------|
| $\text{Co}_3\text{O}_4$ NSs            | 191.2                                                  | 28.2                  |
| $\text{Co}_3\text{O}_4$ NPs            | 183.5                                                  | 8.5                   |
| Calcinated $\text{Co}_3\text{O}_4$ NSs | 36.7                                                   | 41.7                  |

The electrochemical surface area (ECSA), estimated from the electrochemical double-layer capacitance ( $C_{dl}$ ), is one of important factors for the electrochemical performance.<sup>S2, S3</sup> The CVs of various catalysts were studied in the region of 0.15-0.25 V, in which the current response was only derived from the charging of the  $C_{dl}$  (Fig. S7). According to the linear slope of capacitive current vs. scan rate,<sup>S4, S5</sup> the capacitance of the three samples decrease in the order of  $\text{Co}_3\text{O}_4$  NSs ( $49 \text{ mF}\cdot\text{cm}^{-2}$ ) >  $\text{Co}_3\text{O}_4$  NPs ( $22 \text{ mF}\cdot\text{cm}^{-2}$ ) > calcinated  $\text{Co}_3\text{O}_4$  NSs ( $7 \text{ mF}\cdot\text{cm}^{-2}$ ) (Fig. 2A). Apparently, the loose, porous  $\text{Co}_3\text{O}_4$  NSs with low crystallization have more effective surface areas (electroactive sites) than  $\text{Co}_3\text{O}_4$  NP and calcinated  $\text{Co}_3\text{O}_4$  NSs, and thus the highest catalytic activity for OER.

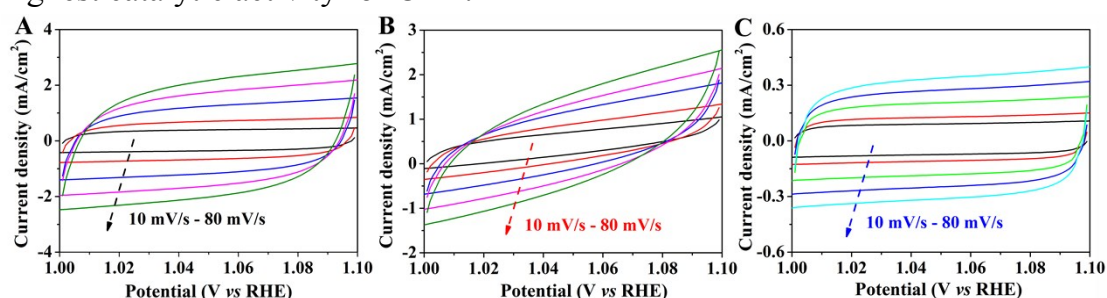

**Fig. S7** (A-C) CVs for  $\text{Co}_3\text{O}_4$  NSs,  $\text{Co}_3\text{O}_4$  NPs, and calcinated  $\text{Co}_3\text{O}_4$  NSs at various scan rate (10, 20, 40, 60 and  $80 \text{ mV}\cdot\text{s}^{-1}$ )

**Table S3.** Four parameters defined for OER activity of  $\text{Co}_3\text{O}_4$  NSs,  $\text{Co}_3\text{O}_4$  NPs and calcinated  $\text{Co}_3\text{O}_4$  NSs.

| Samples                                | Onset potential | Tafel plots ( $\text{mV}\cdot\text{dec}^{-1}$ ) | Current density (overpotential at 300 mV) | Potential ( $j = 10 \text{ mA}\cdot\text{cm}^{-2}$ ) |
|----------------------------------------|-----------------|-------------------------------------------------|-------------------------------------------|------------------------------------------------------|
| $\text{Co}_3\text{O}_4$ NSs            | 1.51 V          | 69                                              | $3.6 \text{ mA}/\text{cm}^2$              | 1.56 V                                               |
| $\text{Co}_3\text{O}_4$ NPs            | 1.54 V          | 96                                              | $1.7 \text{ mA}/\text{cm}^2$              | 1.61 V                                               |
| calcinated $\text{Co}_3\text{O}_4$ NSs | 1.51 V          | 85                                              | $1.2 \text{ mA}/\text{cm}^2$              | 1.59 V                                               |



**Table S4** Comparison of catalytic performance of Co<sub>3</sub>O<sub>4</sub> NSs to some reported Co-based catalysts.

| Materials                                                   | Onset potential (V vs RHE) | Potential (at 10 mA·cm <sup>-2</sup> , V vs RHE) | Tafel slope (mV/dec) | Ref              |
|-------------------------------------------------------------|----------------------------|--------------------------------------------------|----------------------|------------------|
| NiCo LDH/CP <sup>[1]</sup>                                  | 1.535                      | 1.597                                            | 40                   | S6               |
| Exfoliated CoCo LDH                                         | 1.535                      | 1.583                                            | 45                   | S7               |
| Exfoliated NiCo LDH                                         | 1.515                      | 1.564                                            | 41                   |                  |
| NiCo LDH NTAs <sup>[2]</sup>                                | 1.540                      | 1.690                                            | 65                   | S8               |
| Ni NTAs <sup>[2]</sup>                                      | 1.604                      | 1.890                                            | 145                  |                  |
| NG-NiCo LDH <sup>[3]</sup>                                  | 1.580                      | 1.63<br>(at 145.3 mAcm <sup>-2</sup> )           | 614                  | S9               |
| CoNi LDH                                                    | 1.590                      | 1.640<br>(at 5 mAcm <sup>-2</sup> )              | ---                  | S10              |
| CoNi LDHs                                                   | 1.623                      | 1.720<br>(at 1 mAcm <sup>-2</sup> )              | ---                  | S11              |
| CoCo LDHs                                                   | 1.638                      | 1.840                                            | ---                  |                  |
| NiCo LDH/Ni foam                                            | 1.520                      | 1.650                                            | 113                  | S12              |
| ZnCo LDH                                                    | 1.570                      | ---                                              | ---                  | S13              |
| CoMn LDH                                                    | 1.500                      | 1.554                                            | 43                   | S14              |
| NiCoFe LDH                                                  | 1.46                       | ---                                              | 53                   | S15              |
| CoO/N-CG <sup>[4]</sup>                                     | ---                        | 1.570                                            | 71                   | S16              |
| NiCo <sub>2</sub> O <sub>4</sub> HNSs <sup>[5]</sup>        | 1.500                      | 1.590                                            | 64.4                 | S17              |
| PNG-NiCo <sub>2</sub> O <sub>4</sub> <sup>[6]</sup>         | 1.540                      | ---                                              | 156                  | S18              |
| NG-NiCo <sub>2</sub> O <sub>4</sub>                         | 1.570                      | ---                                              | 249                  |                  |
| NiCo <sub>2</sub> O <sub>4</sub> NSs <sup>[7]</sup>         | 1.550                      | ---                                              | 30                   | S19              |
| Ni <sub>0.6</sub> Co <sub>2.4</sub> O <sub>4</sub> /Ni foil | 1.570                      | 1.760                                            | ---                  | S20              |
| Co <sub>3</sub> O <sub>4</sub> /N-rGO                       | ---                        | 1.540                                            | 67                   | S21              |
| CoNi LDH/CoO NSs                                            | 1.480                      | 1.530                                            | 123                  | S22              |
| Co <sub>3</sub> O <sub>4</sub> -CNT                         | 1.51                       | 1.62                                             | 65                   | S23              |
| Co <sub>3</sub> O <sub>4</sub> @/NMC-CNT <sup>[8]</sup>     | 1.50                       | 1.55                                             | 62                   | S24              |
| Co <sub>3</sub> O <sub>4</sub> Nanocubes/N-rGO              | 1.45                       | 1.51                                             | 69                   | S25              |
| <b>Co<sub>3</sub>O<sub>4</sub> NSs</b>                      | <b>1.510</b>               | <b>1.560</b>                                     | <b>69</b>            | <b>This work</b> |

[1] CP, abbreviation for carbon paper;

[2] NTAs, abbreviation for nanotube arrays;

[3] NG, abbreviation for N doped graphene;

[4] N-CG, abbreviation for nitrogen doped hollow crumpled grapheme;

[5] HNSs, abbreviation for hollow nanosponges;

[6] PNG, abbreviation for 3D hybrid film of porous N-doped graphene;

[7] NSs, abbreviation for nanosheets;

[8] NMC, abbreviation for N-doped mesoporous carbon layer.

The RRDE technique was used for confirm the intermediate products formed on  $\text{Co}_3\text{O}_4$  NSs catalyst surface during OER process. In general, OER on catalysts could carry out a four-electron step to form  $\text{O}_2$ , or a two-electron pathway to form  $\text{H}_2\text{O}_2$  as the intermediate product before the oxygen evolution. The Pt ring electrode potentials of 1.20 V and 0.60 V are applied to detect the  $\text{H}_2\text{O}_2$  and  $\text{O}_2$ , respectively, at a scan potential ranging of the disk from 1.2 to 1.8 V.<sup>S22</sup> As shown in Fig. S8, when the Pt ring electrode potential is 1.20 V, a microamp-scale oxidation current is recorded (red line), implying negligible production of hydrogen peroxide in the system. Instead, an apparent oxygen reduction reaction (ORR) current was obtained at a Pt ring electrode potential of 0.60 V.

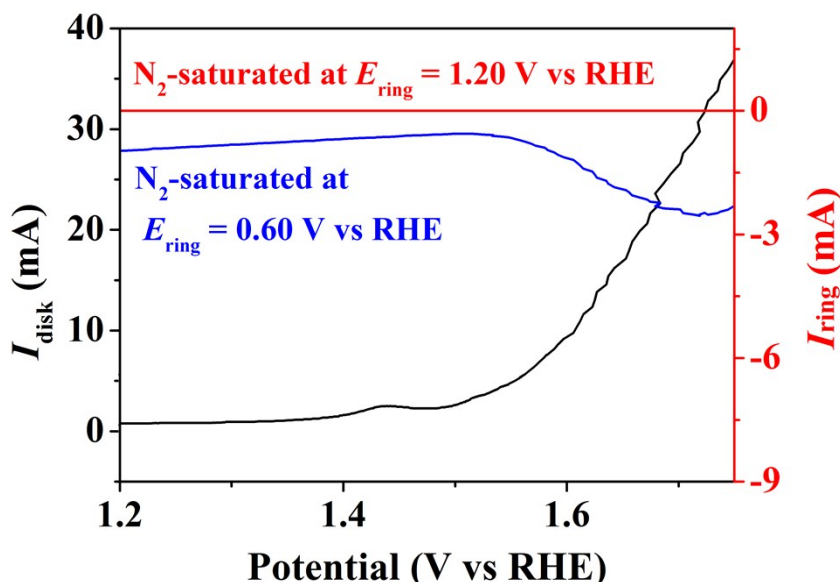

**Fig. S8** RRDE measurement of ring current density recorded at the Pt ring electrode maintained at 1.2 or 0.6 V (vs. RHE) in  $\text{N}_2$ -saturated 1.0 M KOH solution and the related current density at the  $\text{Co}_3\text{O}_4$  NSs disk electrode (rotation speed: 1600 rpm, scan rate:  $5 \text{ mV}\cdot\text{s}^{-1}$ ).

To further evaluate the catalytic activity of  $\text{Co}_3\text{O}_4$  NSs towards  $\text{H}_2\text{O}_2$  oxidation, the typical amperometric response of  $\text{Co}_3\text{O}_4$  NSs to the successive addition of different amounts of  $\text{H}_2\text{O}_2$  into the stirring 1 M KOH is recorded at 1.45 V vs. RHE (as shown in Fig. S9A). With the concentration of  $\text{H}_2\text{O}_2$  increases, the electrochemical response of  $\text{Co}_3\text{O}_4$  NSs displays a typical staircase curve. The  $\text{Co}_3\text{O}_4$  NSs activity in the reaction with  $\text{H}_2\text{O}_2$  can be

described by the calibration curve in Fig. S9B. The increases of the current density is proportional to the  $\text{H}_2\text{O}_2$  concentrations, and two linear response for  $\text{H}_2\text{O}_2$  are expressed as: (1)  $I (\mu\text{A}) = 2.27 (\text{mA} \cdot \mu\text{M}^{-1}) C (\mu\text{M}, \text{H}_2\text{O}_2) + 10.28 (\mu\text{A})$  ( $5\text{-}71 \mu\text{M}$ ,  $R^2 = 0.997$ , blue line); (2)  $I (\mu\text{A}) = 0.68 (\mu\text{A} \cdot \mu\text{M}^{-1}) C (\mu\text{M}, \text{H}_2\text{O}_2) + 109.24 (\mu\text{A})$  ( $80\text{-}700 \mu\text{M}$ ,  $R^2 = 0.993$ , red line). Derived from the calibration curve, the electrochemical response of  $\text{Co}_3\text{O}_4$  NSs towards  $\text{H}_2\text{O}_2$  can reach as low as  $16.9 \mu\text{M}/\text{cm}^2$  ( $\text{S}/\text{N} = 3$ ). The results suggest that  $\text{Co}^{\text{III}}/\text{Co}^{\text{IV}}$  redox couple formed at  $1.45 \text{ V vs. RHE}$  can facilitate  $\text{H}_2\text{O}_2$  oxidation.

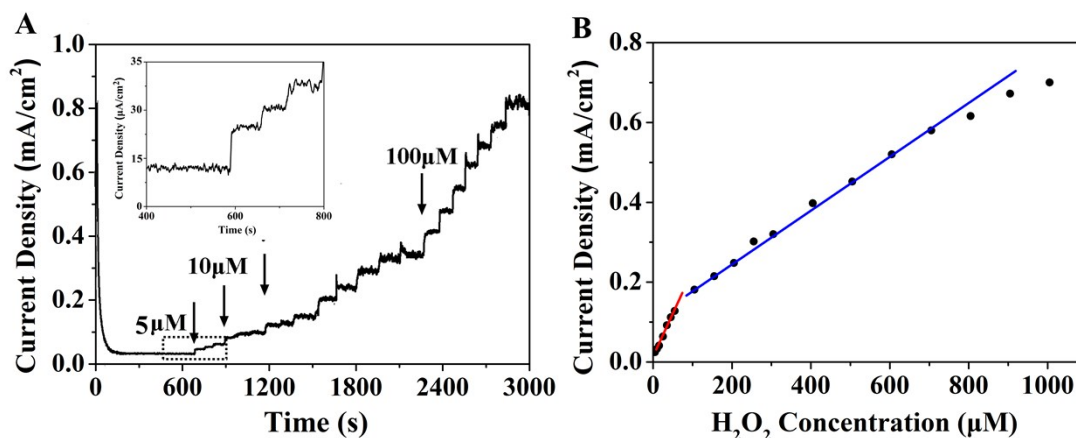

**Fig. S9** (A) I-t curve of  $\text{Co}_3\text{O}_4$  NSs on GCE (holding at  $1.45 \text{ V vs. RHE}$ ) for the successive addition of  $\text{H}_2\text{O}_2$  in  $1 \text{ M KOH}$  (insert is the partial enlargement); (B) the linear calibration relationship of current vs.  $\text{H}_2\text{O}_2$  concentration (insert is the partial enlargement).

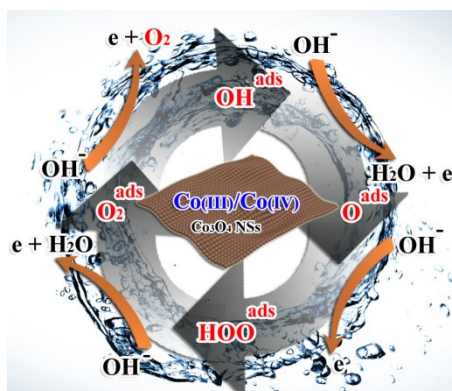

**Fig. S10** The schematic illustration of the proposed catalytic mechanism of  $\text{Co}_3\text{O}_4$  NSs towards OER.

The electrocatalytic activity of  $\text{Co}_3\text{O}_4$  NSs towards  $\text{H}_2\text{O}_2$  was also studied. To assess the reaction kinetics properties, CVs of  $\text{Co}_3\text{O}_4$  NSs at different scan rates (from 5-100  $\text{mV}\cdot\text{s}^{-1}$ ) are shown in Fig. S11A. In the CVs, the obvious pair of redox peaks, the cathodic peak ( $i_{pc}$ ) at about 1.45 V vs. RHE and the anodic peak ( $i_{pa}$ ) at about 1.4 V vs. RHE, are also associated to the electrochemical transformation of  $\text{Co}^{\text{III}}/\text{Co}^{\text{IV}}$  (1.2 vs. RHE and 1.15 vs. RHE are attribute to  $\text{Co}^{\text{II}}/\text{Co}^{\text{III}}$ ). With an increase of the scan rate, the cathodic and anodic peak currents are increase. Apparently, the relationship between the peak currents of  $\text{Co}^{\text{III}}/\text{Co}^{\text{IV}}$  (both  $i_{pa}$  and  $i_{pc}$ ) and the square root of the scan rate ( $\nu^{1/2}$ ) can be evaluated by the series linear plots (shown in Fig. S11B). The calibration plots can be described by eqn (S1.1) and eqn (S1.2). According to the characteristic indexes of the heterogeneous electron transfer reactions, the electron transfer kinetics of the  $\text{Co}_3\text{O}_4$  NSs is controlled by diffusion confinement.

$$i_{pa} = 4.49 \nu^{1/2} - 5.48 \quad (R^2 = 0.997) \quad (\text{S1.1})$$

$$i_{pc} = -3.28 \nu^{1/2} + 2.52 \quad (R^2 = 0.998) \quad (\text{S1.2})$$

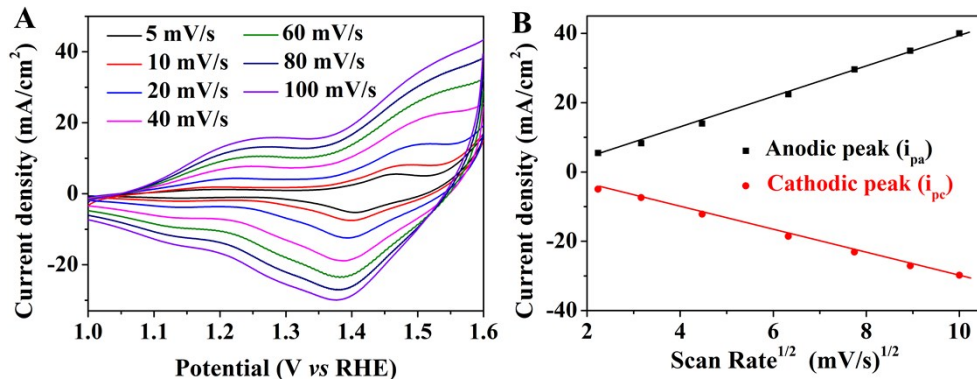

**Fig. S11** (A) CVs of  $\text{Co}_3\text{O}_4$  NSs on GCE in 1 M KOH solution ( $\text{pH} = 13.8$ ) measured at different scan rates (5-100  $\text{mV}\cdot\text{s}^{-1}$ ); (B) the linear calibration relationship between the anodic (black line) and cathodic (red line) peak currents and the square root of the scan rate.

**Additional notes and references:**

- S1 Schultze J. W. Sergio Trasatti (Ed.): Electrodes of Conductive Metallic Oxides, Part A. *Elsevier Scientific Publishing Company*, Amsterdam, New York 1980.
- S2 S. Trasatti, O. A. Petri, *Pure Appl. Chem.*, 1991, **63(5)**, 711 – 734.
- S3 H. J. Yan, C. G. Tian, L. Wang, A. Wu, H. G. Fu, *Angew. Chem. Int. Ed.*, 2015, **54**, 6325-6329.
- S4 F. Song and X. Hu, *Nat. Commun.*, 2014, **5**, 0447.
- S5 M. A. Lukowski, S. A. Daniel, F. Meng, A. Forticaux, L. Li, and S. Jin, *J. Am. Chem. Soc.*, 2013, **135**, 10274–10277.
- S6 H. F. Liang, F. Meng, M. Cabán-Acevedo, L. S. Li, A. Forticaux, L. C. Xiu, Z. C. Wang and S. Jin, *Nano Lett.*, 2015, **15**, 1421-1427.
- S7 F. Song and X. L. Hu, *Nat. Comm.*, 2014, **5**, 4477.
- S8 Z. L. Zhao, H. X. Wu, H. L. He, X. L. Xua and Y. D. Jin, *Adv. Funct. Mater.*, 2014, **24**, 4698-4705.
- S9 S. Chen, J. J. Duan, M. Jaroniec and S. Z. Qiao, *Angew. Chem. Int. Ed.*, 2013, **52**, 13567-13570.
- S10 R. Valdez, D. B. Grotjahn, D. K. Smith, J. M. Quintana and A. Olivas, *Int. J. Electrochem. Sci.*, 2015, **10**, 909-918.
- S11 Y. Zhang, B. Cui, C. S. Zhao, H. Lin and J. B. Li, *Phys. Chem. Chem. Phys.* 2013, **15**, 7363-7369.
- S12 J. Jiang, A. L. Zhang, L. L. Li and L. H. Ai, *J. Power Sources*, 2015, **278**, 445-451.
- S13 X. X. Zou, A. Goswami and T. Asefa, *J. Am. Chem. Soc.*, 2013, **135**, 17242-17245.
- S14 F. Song and X. L. Hu, *J. Am. Chem. Soc.*, 2014, **136**, 16481-16484.
- S15 Q. Yang, T. Li, Z. Y. Lu, X. M. Sun and J. F. Liu, *Nanoscale*, **2014**, **6**, 11789-11794.
- S16 S. Mao, Z. H. Wen, T. Z. Huang, Y. Hou and J. H. Chen, *Energy Environ. Sci.*, 2014, **7**, 609-616.
- S17 C. Z. Zhu, D. Wen, S. Leubner, M. Oschatz and W. Liu, *Chem. Commun.*, 2015, **51**, 7851-7854.

- S18 S. Chen and S. Z. Qiao, *ACS Nano*, 2013, **7**, 10190-10196.
- S19 J. Bao, X. D. Zhang, B. Fan, J. J. Zhang, M. Zhou, W. L. Yang, X. Hu, H. Wang, B. C. Pan and Y. Xie, *Angew. Chem. Int. Ed.*, 2015, **54**, 7399-7404.
- S20 T. N. Lambert, J. A. Vigil, S. E. White, D. J. Davis, S. J. Limmer, P. D. Burton, E. N. Coker, T. E. Beechame and M. T. Brumbach, *Chem. Commun.*, 2015, **51**, 9511-9514.
- S21 Y. Liang, Y. G. Li, H. L. Wang, J. G. Zhou, J. Wang, T. Regier and H. J. Dai, *Nat. Mater.*, 2011, **10**, 780-786.
- S22 J. Wu, Z. Y. Ren, S. C. Du, L. J. Kong, B. W. Liu, W. Xi, J. Q. Zhu and H. G. Fu, *Nano Research*. 2016, DOI 10.1007/s12274-015-0950-4.
- S23 X. Y. Lu and C. Zhao, *J. Mater. Chem. A.*, 2013, **1**, 12053-12059.
- S24 X. Z. Li, Y. Y. Fang, X. Q. Lin, M. Tian, X. C. An, Y. Fu, R. Li, J. J. and J. T. Ma, *J. Mater. Chem. A.*, 2015, **3**, 17392-17402.
- S25 S. K. Singh, V. M. Dhavale and S. Kurungot, *ACS Appl. Mater. Interfaces*, 2015, **7**, 442-451.
